# Supplementary material
Source: PubMed Central journal article supplement (PMC8443022)
Supplement: mmc1.pdf [file mmc1.pdf]

# THE LANCET

## Global Health

### Supplementary appendix 1

This translation in Spanish was submitted by the authors and we reproduce it as supplied. It has not been peer reviewed. *The Lancet's* editorial processes have only been applied to the original in English, which should serve as reference for this manuscript.

Los autores nos proporcionaron esta traducción al español y la reproducimos tal como nos fue entregada. No la hemos revisado. Los procesos editoriales de *The Lancet* se han aplicado únicamente al original en inglés, que debe servir de referencia para este manuscrito.

Supplement to: Moya A, Serneels P, Desrosiers A, Reyes V, Torres MJ, Lieberman A. The COVID-19 pandemic and maternal mental health in a fragile and conflict-affected setting in Tumaco, Colombia: a cohort study. *Lancet Glob Health* 2021; published online June 24. [http://dx.doi.org/10.1016/S2214-109X\(21\)00217-5](http://dx.doi.org/10.1016/S2214-109X(21)00217-5).

# La pandemia del COVID-19 y la salud mental maternal en un entorno frágil y afectado por el conflicto en Tumaco, Colombia: un estudio de cohortes

## Resumen

**Contexto** Los efectos de la pandemia de COVID-19 sobre la salud mental no han sido analizados en profundidad entre poblaciones vulnerables, particularmente en entornos frágiles y afectados por conflictos. En este artículo, analizamos cómo la pandemia se relaciona con cambios tempranos en la salud mental y el estrés en las relaciones parentales entre madres jóvenes, muchas de las cuales son personas desplazadas internas, en un entorno afectado por el conflicto en Colombia.

**Métodos** Para este estudio de cohorte, utilizamos datos longitudinales de un programa de acompañamiento psicosocial en el que se asignaron 1376 cuidadores al azar en cuatro cohortes secuenciales. El reclutamiento de participantes tuvo lugar en marzo de 2018, para la cohorte 1, julio de 2018, para la cohorte 2, marzo de 2019, para la cohorte 3, y julio de 2019, para la cohorte 4. Para cada cohorte, recogimos datos antes de iniciar el programa, y al mes y a los 8 meses de terminar el programa. La recolección final, a los 8 meses de terminar el programa, ocurrió antes de la pandemia de COVID-19 para los participantes de las cohortes 1 y 2 ( $n = 573$ ), mientras que los de las cohortes 3 y 4 ( $n = 803$ ) los datos se recogieron al inicio de la pandemia, 2-5 semanas después de que el Gobierno Nacional decretara la política de Aislamiento Obligatorio el 25 de marzo de 2020. La ansiedad y la depresión del cuidador primario las medimos con una escala adaptada del Inventario de Síntomas-90-R mientras que el estrés parental se midió con la escala abreviada del Índice de Estrés Parental. Para identificar los cambios en la salud mental asociados con la pandemia, utilizamos modelos de variables dependientes rezagadas en donde comparamos los datos en la última recolección entre las Cohortes que fueron evaluadas antes de la pandemia con aquellas que fueron evaluadas durante las primeras semanas de la pandemia.

**Resultados** Los resultados indicaron que la probabilidad de síntomas por encima del umbral de riesgo aumentó en 14 puntos porcentuales para la ansiedad (IC del 95%: 10-17), 5 puntos porcentuales para la depresión (0 5-9) y 10 puntos porcentuales para el estrés parental (5- 15). El deterioro de la salud mental fue más fuerte para los desplazados internos, los participantes con menor nivel educativo o condiciones de salud mental preexistentes, y para aquellos que informaron un mayor número de factores estresantes, incluida la inseguridad alimentaria y la pérdida de empleo.

**Interpretación** La salud mental maternal se deterioró significativamente durante las primeras semanas de la pandemia. Considerando la vulnerabilidad y las condiciones de salud mental preexistentes de esta población, los efectos estimados son sustanciales. Las políticas en entornos frágiles y afectados por conflictos dirigidas a proteger y apoyar a la población desplazada y otras personas vulnerables serán fundamentales para mitigar los problemas socioeconómicos y de salud mental asociados con la pandemia.

**Financiación** Saving Brains–Grand Challenges Canada, Fundación Éxito, Fundación FEMSA, United Way Colombia, Universidad de los Andes.
